# Supplementary material
Source: PubMed Central journal article supplement (PMC4502954)
Supplement: NIHMS292648-supplement-Appendix_S1.pdf [file NIHMS292648-supplement-Appendix_S1.pdf]

**Primers used:**

Forward primer:

All bacteria                      Amp\_27F\_v4                      5'-AGRGTTYGATYMTGGCTCAG-3'

Reverse primers:

All bacteria                      Eub\_338R\_3W                      5'-GCWGCCWCCCGTAGGWGT-3'

Bifidobacterium                      Bif\_162R                      5'-CCGGYATTACCACCCGTTT-3'

Collinsella                      Coll\_230R                      5'-TCACCCCGCCGTCTACCTGAT-3'

Faecalibacterium                      Faec\_396R                      5'-CCGAAGACCTTCTTCCTCC-3'
