# Supplementary material
Source: PubMed Central journal article supplement (PMC4502954)
Supplement: NIHMS292648-supplement-Table_S1.pdf [file NIHMS292648-supplement-Table_S1.pdf]

| Class             | Alphaproteobacteria | Betaproteobacteria | Gammaproteobacteria | Deltaproteobacteria | Epsilonproteobacteria | Clostridia | Mollicutes | Bacilli | Actinobacteria | Spirochaetes | Bacteroidetes | Fusobacteria | Verrucomicrobiae | Lentisphaerae |
|-------------------|---------------------|--------------------|---------------------|---------------------|-----------------------|------------|------------|---------|----------------|--------------|---------------|--------------|------------------|---------------|
| <b>aHLT</b>       |                     |                    |                     |                     |                       |            |            |         |                |              |               |              |                  |               |
| <b>aHLT-Wmean</b> | 0.13%               | 1.15%              | 0.30%               | 0.71%               | 0.01%                 | 74.38%     | 1.57%      | 3.59%   | 6.94%          | 0.07%        | 8.72%         | -            | 0.93%            | 0.23%         |
| aHLT02            | -                   | 0.05%              | 0.04%               | 1.77%               | -                     | 76.83%     | 1.72%      | 4.36%   | 4.29%          | 0.27%        | 7.83%         | -            | 2.83%            | -             |
| aHLT03            | -                   | 2.74%              | 1.05%               | 0.89%               | -                     | 62.68%     | 0.79%      | 2.12%   | 14.89%         | 0.10%        | 12.66%        | -            | 1.45%            | 0.62%         |
| aHLT05            | -                   | 0.03%              | 0.33%               | 0.07%               | -                     | 80.01%     | 6.04%      | 4.36%   | 1.09%          | 0.05%        | 7.30%         | -            | 0.72%            | -             |
| aHLT06            | -                   | 0.49%              | 0.04%               | -                   | -                     | 79.19%     | 6.88%      | 0.78%   | 0.93%          | -            | 10.51%        | -            | 1.18%            | -             |
| aHLT07            | -                   | 2.93%              | 0.99%               | 1.28%               | -                     | 68.34%     | 2.32%      | 7.86%   | 1.86%          | 0.07%        | 13.36%        | -            | 0.98%            | 0.02%         |
| aHLT08            | -                   | 2.67%              | 0.08%               | 0.82%               | -                     | 69.96%     | 0.61%      | 1.76%   | 15.91%         | -            | 5.83%         | -            | 1.61%            | 0.11%         |
| aHLT09            | -                   | 0.29%              | 0.09%               | -                   | -                     | 79.70%     | 0.39%      | 4.68%   | 9.76%          | 0.07%        | 4.69%         | -            | 0.33%            | -             |
| aHLT10            | 2.38%               | 3.49%              | 0.10%               | 0.75%               | 0.02%                 | 72.75%     | 0.55%      | 2.42%   | 5.66%          | 0.11%        | 8.81%         | -            | -                | 2.97%         |
| aHLT11            | -                   | 0.77%              | 0.40%               | -                   | 0.07%                 | 75.05%     | 0.37%      | 2.24%   | 9.46%          | 0.08%        | 11.02%        | -            | 0.54%            | -             |
| aHLT13            | -                   | 0.24%              | 0.40%               | 1.56%               | -                     | 75.77%     | 0.70%      | 6.85%   | 8.09%          | -            | 6.16%         | -            | 0.24%            | -             |
| <b>kHLT</b>       |                     |                    |                     |                     |                       |            |            |         |                |              |               |              |                  |               |
| <b>kHLT-Wmean</b> | 0.05%               | 0.68%              | 0.40%               | 0.98%               | 0.00%                 | 72.17%     | 1.19%      | 4.40%   | 10.33%         | 0.03%        | 8.08%         | 0.00%        | 1.01%            | 0.08%         |
| kHLT05            | 0.20%               | 1.71%              | 0.02%               | 2.05%               | -                     | 64.48%     | 1.18%      | 7.02%   | 11.85%         | -            | 11.22%        | -            | -                | -             |
| kHLT06            | 0.03%               | 0.87%              | 0.87%               | 1.03%               | -                     | 66.13%     | 6.18%      | 2.01%   | 10.50%         | -            | 9.84%         | 0.02%        | 2.47%            | 0.04%         |
| kHLT07            | -                   | 1.25%              | 0.10%               | 1.12%               | 0.07%                 | 72.27%     | 1.22%      | 3.85%   | 10.30%         | 0.05%        | 7.69%         | -            | 2.05%            | 0.04%         |
| kHLT08            | -                   | 0.02%              | 1.76%               | 1.46%               | -                     | 74.95%     | 1.47%      | 7.42%   | 6.44%          | -            | 6.13%         | -            | 0.34%            | -             |
| kHLT09            | -                   | -                  | 0.30%               | -                   | -                     | 81.09%     | 0.46%      | 6.03%   | 2.87%          | -            | 9.26%         | -            | -                | -             |
| kHLT10            | 1.56%               | 0.22%              | 0.08%               | 1.70%               | -                     | 71.31%     | 0.62%      | 1.66%   | 9.71%          | 0.03%        | 10.58%        | -            | 1.64%            | 0.07%         |
| kHLT11            | -                   | 0.02%              | 2.39%               | -                   | 0.08%                 | 76.42%     | 3.35%      | 6.72%   | 11.02%         | -            | 0.01%         | -            | -                | -             |
| kHLT12            | -                   | 1.14%              | 0.05%               | 0.73%               | -                     | 63.54%     | 0.22%      | 2.64%   | 22.01%         | 0.46%        | 9.21%         | -            | -                | -             |
| kHLT13            | 0.01%               | 0.76%              | 0.88%               | 1.10%               | -                     | 72.23%     | 0.50%      | 2.91%   | 13.34%         | 0.03%        | 7.31%         | -            | 0.93%            | 0.01%         |
| kHLT14            | -                   | 1.27%              | 0.02%               | 1.28%               | -                     | 79.63%     | 1.51%      | 1.03%   | 5.53%          | -            | 7.70%         | -            | 2.01%            | 0.03%         |
| kHLT15            | -                   | 1.15%              | 0.15%               | 1.42%               | -                     | 68.53%     | 0.45%      | 4.66%   | 16.78%         | 0.20%        | 6.65%         | -            | 0.02%            | -             |
| kHLT16            | -                   | 1.19%              | 0.21%               | 1.25%               | -                     | 72.09%     | 0.29%      | 4.13%   | 12.50%         | 0.10%        | 6.87%         | -            | 1.38%            | -             |
| kHLT17            | 0.01%               | 0.79%              | 1.09%               | -                   | -                     | 70.21%     | 2.75%      | 7.31%   | 11.25%         | -            | 6.35%         | 0.01%        | 0.22%            | -             |
| kHLT18            | -                   | 0.52%              | 0.12%               | -                   | -                     | 83.27%     | 0.51%      | 4.79%   | 0.23%          | -            | 10.30%        | -            | 0.27%            | -             |
| kHLT19            | -                   | -                  | 0.18%               | 1.09%               | -                     | 77.08%     | 0.59%      | 4.52%   | 7.49%          | -            | 8.93%         | -            | -                | 0.12%         |
| kHLT20            | -                   | 0.31%              | 0.20%               | 1.03%               | -                     | 74.69%     | 0.68%      | 2.70%   | 10.28%         | 0.02%        | 7.68%         | -            | 2.41%            | -             |
| kHLT22            | -                   | 0.62%              | 0.47%               | 0.02%               | -                     | 67.47%     | 1.56%      | 7.96%   | 11.03%         | 0.02%        | 9.31%         | -            | 1.53%            | -             |
| kHLT23            | -                   | 0.49%              | 0.76%               | 2.84%               | -                     | 67.18%     | 5.23%      | 3.31%   | 6.23%          | 0.18%        | 9.14%         | -            | 2.14%            | 2.50%         |
| kHLT24            | -                   | 2.08%              | 0.03%               | 1.12%               | -                     | 68.92%     | 0.62%      | 5.01%   | 9.17%          | -            | 13.06%        | -            | -                | -             |
| kHLT26            | -                   | 0.41%              | 0.27%               | 1.11%               | 0.04%                 | 72.64%     | 1.28%      | 4.74%   | 10.58%         | -            | 7.46%         | -            | 1.47%            | -             |
| kHLT27            | -                   | 0.34%              | 0.29%               | -                   | -                     | 72.43%     | 0.58%      | 4.03%   | 13.69%         | 0.02%        | 6.52%         | -            | 2.09%            | -             |
| kHLT28            | -                   | 0.43%              | 0.58%               | 0.67%               | -                     | 73.63%     | 0.59%      | 3.29%   | 13.22%         | 0.03%        | 6.23%         | -            | 1.34%            | -             |
