# Supplementary material
Source: PubMed Central journal article supplement (PMC4502954)
Supplement: NIHMS292648-supplement-Table_S3.pdf [file NIHMS292648-supplement-Table_S3.pdf]

| Probiot name         | Phyla group             | % Present |       |       |     |     |     |     |     |     |      |      |      |      |      |      |      |      |      |      |      |      |      |      |      |      |      |      |      |   |   |
|----------------------|-------------------------|-----------|-------|-------|-----|-----|-----|-----|-----|-----|------|------|------|------|------|------|------|------|------|------|------|------|------|------|------|------|------|------|------|---|---|
|                      |                         | SH1       | SH2   | SH3   | SH4 | SH5 | SH6 | SH7 | SH8 | SH9 | SH10 | SH11 | SH12 | SH13 | SH14 | SH15 | SH16 | SH17 | SH18 | SH19 | SH20 | SH21 | SH22 | SH23 | SH24 | SH25 | SH26 | SH27 | SH28 |   |   |
| S827_Prevotella      | Prevotella spp.         | 0.0%      | 0.0%  | 0.0%  | A   | A   | A   | A   | A   | A   | A    | A    | A    | A    | A    | A    | A    | A    | A    | A    | A    | A    | A    | A    | A    | A    | A    | A    | A    | A |   |
| S828_Prevotella      | Prevotella spp.         | 0.0%      | 20.0% | 0.0%  | A   | P   | A   | A   | A   | A   | A    | A    | A    | A    | A    | A    | A    | A    | A    | A    | A    | A    | A    | A    | A    | A    | A    | A    | A    | A |   |
| S829_Prevotella      | Prevotella spp.         | 0.0%      | 0.0%  | 0.0%  | A   | A   | A   | A   | A   | A   | A    | A    | A    | A    | A    | A    | A    | A    | A    | A    | A    | A    | A    | A    | A    | A    | A    | A    | A    | A |   |
| S830_Anaerophaga     | Anaerophaga spp.        | 31.8%     | 60.0% | 30.4% | A   | P   | P   | A   | P   | P   | A    | P    | P    | P    | P    | P    | P    | P    | P    | P    | P    | P    | P    | P    | P    | P    | P    | P    | P    | P |   |
| S831_Tannerella      | Tannerella spp.         | 0.0%      | 0.0%  | 0.0%  | A   | A   | A   | A   | A   | A   | A    | A    | A    | A    | A    | A    | A    | A    | A    | A    | A    | A    | A    | A    | A    | A    | A    | A    | A    | A |   |
| S832_Anaerophaga     | Anaerophaga spp.        | 4.5%      | 10.0% | 4.3%  | A   | A   | A   | A   | P   | A   | A    | A    | A    | A    | A    | A    | A    | A    | A    | A    | A    | A    | A    | A    | A    | A    | A    | A    | A    | A |   |
| S834_Rikenellaceae   | Rikenellaceae spp.      | 22.7%     | 30.0% | 21.7% | A   | P   | A   | A   | P   | A   | A    | A    | P    | A    | A    | A    | P    | A    | A    | A    | A    | A    | A    | A    | A    | A    | A    | A    | P    | A |   |
| S835_Anaerophaga     | Anaerophaga spp.        | 40.9%     | 70.0% | 39.1% | A   | P   | P   | P   | P   | P   | A    | P    | P    | P    | P    | P    | P    | P    | P    | P    | P    | P    | P    | P    | P    | P    | P    | P    | P    | P |   |
| S836_Porphyrionadac  | Porphyromonadaceae spp. | 18.2%     | 10.0% | 17.4% | A   | A   | A   | A   | P   | A   | A    | A    | P    | P    | A    | A    | P    | A    | A    | A    | A    | A    | A    | A    | A    | A    | A    | A    | A    | A | A |
| S837_Rikenellaceae   | Rikenellaceae spp.      | 0.0%      | 0.0%  | 0.0%  | A   | A   | A   | A   | A   | A   | A    | A    | A    | A    | A    | A    | A    | A    | A    | A    | A    | A    | A    | A    | A    | A    | A    | A    | A    | A | A |
| S838_Prevotella      | Prevotella spp.         | 4.5%      | 0.0%  | 4.3%  | A   | A   | A   | A   | A   | A   | A    | A    | A    | A    | A    | A    | A    | A    | A    | A    | A    | A    | A    | A    | A    | A    | A    | A    | A    | A | A |
| S839_Anaerophaga     | Anaerophaga spp.        | 4.5%      | 0.0%  | 4.3%  | A   | A   | A   | A   | A   | A   | A    | A    | A    | A    | A    | A    | A    | A    | A    | A    | A    | A    | A    | A    | A    | A    | A    | A    | A    | A | A |
| S840_Anaerophaga     | Anaerophaga spp.        | 0.0%      | 0.0%  | 0.0%  | A   | A   | A   | A   | A   | A   | A    | A    | A    | A    | A    | A    | A    | A    | A    | A    | A    | A    | A    | A    | A    | A    | A    | A    | A    | A | A |
| S841_Bacteroidaceae  | Bacteroidaceae spp.     | 36.4%     | 60.0% | 34.8% | A   | P   | P   | A   | P   | P   | P    | P    | P    | P    | P    | P    | P    | P    | P    | P    | P    | P    | P    | P    | P    | P    | P    | P    | P    | P | P |
| S842_Bacteroidaceae  | Bacteroidaceae spp.     | 31.8%     | 50.0% | 30.4% | A   | P   | A   | P   | P   | A   | P    | P    | P    | P    | P    | P    | P    | P    | P    | P    | P    | P    | P    | P    | P    | P    | P    | P    | P    | P | P |
| S843_Rikenella       | Rikenella spp.          | 0.0%      | 20.0% | 0.0%  | A   | A   | P   | A   | P   | A   | A    | A    | A    | A    | A    | A    | A    | A    | A    | A    | A    | A    | A    | A    | A    | A    | A    | A    | A    | A | A |
| S844_Bacteroides     | Bacteroides spp.        | 9.1%      | 10.0% | 0.7%  | A   | A   | A   | P   | A   | A   | A    | A    | A    | A    | A    | A    | A    | A    | A    | A    | A    | A    | A    | A    | A    | A    | A    | A    | A    | A | A |
| S845_Prevotella      | Prevotella spp.         | 4.5%      | 10.0% | 4.3%  | A   | A   | A   | A   | A   | P   | A    | A    | A    | A    | A    | A    | A    | A    | A    | A    | A    | A    | A    | A    | A    | A    | A    | A    | A    | A | A |
| S846_Prevotella      | Prevotella spp.         | 18.2%     | 10.0% | 17.4% | A   | A   | A   | P   | A   | A   | A    | A    | A    | A    | A    | A    | A    | A    | A    | A    | A    | A    | A    | A    | A    | A    | A    | A    | A    | A | A |
| S847_Fusobacterium   | Fusobacterium spp.      | 4.5%      | 0.0%  | 4.3%  | A   | A   | A   | A   | A   | A   | A    | A    | A    | A    | A    | A    | A    | A    | A    | A    | A    | A    | A    | A    | A    | A    | A    | A    | A    | A | A |
| S848_Fusobacterium   | Fusobacterium nucleatum | 4.5%      | 0.0%  | 4.3%  | A   | A   | A   | A   | A   | A   | A    | A    | A    | A    | A    | A    | A    | A    | A    | A    | A    | A    | A    | A    | A    | A    | A    | A    | A    | A | A |
| S849_Cetobacterium   | Cetobacterium somerae   | 0.0%      | 0.0%  | 0.0%  | A   | A   | A   | A   | A   | A   | A    | A    | A    | A    | A    | A    | A    | A    | A    | A    | A    | A    | A    | A    | A    | A    | A    | A    | A    | A | A |
| S850_Verrucomicrobiu | Verrucomicrobium spp.   | 72.7%     | 80.0% | 63.6% | P   | P   | P   | P   | P   | P   | P    | P    | P    | P    | P    | P    | P    | P    | P    | P    | P    | P    | P    | P    | P    | P    | P    | P    | P    | P | P |
| S851_Victivallis     | Victivallis vadensis    | 31.8%     | 40.0% | 30.4% | A   | P   | A   | P   | P   | A   | P    | A    | A    | A    | A    | A    | A    | A    | A    | A    | A    | A    | A    | A    | A    | A    | A    | A    | A    | A | A |
| S852_Papillibacter   | Papillibacter spp.      | 81.8%     | 80.0% | 78.3% | P   | P   | P   | P   | P   | P   | P    | P    | P    | P    | P    | P    | P    | P    | P    | P    | P    | P    | P    | P    | P    | P    | P    | P    | P    | P | P |

| Core microbiome | 56 | Sum | 294 | 345 | 347 | 276 | 385 | 335 | 290 | 362 | 345 | 320 | 348 | 373 | 369 | 214 | 224 | 407 | 209 | 209 | 382 | 242 | 253 | 287 | 275 | 316 | 273 | 312 | 308 | 389 | 281 | 371 | 325 | 365 |
|-----------------|----|-----|-----|-----|-----|-----|-----|-----|-----|-----|-----|-----|-----|-----|-----|-----|-----|-----|-----|-----|-----|-----|-----|-----|-----|-----|-----|-----|-----|-----|-----|-----|-----|-----|
|-----------------|----|-----|-----|-----|-----|-----|-----|-----|-----|-----|-----|-----|-----|-----|-----|-----|-----|-----|-----|-----|-----|-----|-----|-----|-----|-----|-----|-----|-----|-----|-----|-----|-----|-----|
