# Supplementary material
Source: PubMed Central journal article supplement (PMC4502954)
Supplement: NIHMS292648-supplement-Table_S4.pdf [file NIHMS292648-supplement-Table_S4.pdf]

| Class                    | Alphaproteobacteria | Betaproteobacteria | Gammaproteobacteria | Deltaproteobacteria | Epsilonproteobacteria | Clostridia | Mollicutes | Bacilli | Actinobacteria | Spirochaetes | Bacteroidetes | Fusobacteria | Verrucomicrobiae | Lentisphaerae | Total |
|--------------------------|---------------------|--------------------|---------------------|---------------------|-----------------------|------------|------------|---------|----------------|--------------|---------------|--------------|------------------|---------------|-------|
| <b>aHLT</b>              |                     |                    |                     |                     |                       |            |            |         |                |              |               |              |                  |               |       |
| Total # samples detected | 1                   | 10                 | 10                  | 7                   | 2                     | 10         | 10         | 10      | 10             | 7            | 10            | 0            | 9                | 4             | 10    |
| Average Detection        | 0.1                 | 2.3                | 2.9                 | 1.0                 | 0.2                   | 266.3      | 4.8        | 9.7     | 10.9           | 0.7          | 29.6          | 0.0          | 0.9              | 0.4           | 329.9 |
| St. error                | 0.1                 | 0.4                | 0.3                 | 0.3                 | 0.1                   | 6.3        | 0.5        | 0.8     | 1.4            | 0.2          | 3.4           | 0.0          | 0.1              | 0.2           | 10.9  |
| aHLT02                   | 0                   | 1                  | 2                   | 1                   | 0                     | 247        | 7          | 10      | 7              | 1            | 17            | 0            | 1                | 0             | 294   |
| aHLT03                   | 0                   | 4                  | 4                   | 2                   | 0                     | 264        | 5          | 9       | 15             | 1            | 39            | 0            | 1                | 1             | 345   |
| aHLT05                   | 0                   | 1                  | 3                   | 1                   | 0                     | 287        | 4          | 11      | 7              | 1            | 31            | 0            | 1                | 0             | 347   |
| aHLT06                   | 0                   | 2                  | 2                   | 0                   | 0                     | 236        | 6          | 5       | 2              | 0            | 22            | 0            | 1                | 0             | 276   |
| aHLT07                   | 0                   | 4                  | 3                   | 3                   | 0                     | 291        | 8          | 13      | 11             | 1            | 49            | 0            | 1                | 1             | 385   |
| aHLT08                   | 0                   | 3                  | 2                   | 1                   | 0                     | 276        | 3          | 7       | 14             | 0            | 26            | 0            | 1                | 1             | 335   |
| aHLT09                   | 0                   | 1                  | 3                   | 0                   | 0                     | 243        | 4          | 11      | 9              | 1            | 17            | 0            | 1                | 0             | 290   |
| aHLT10                   | 1                   | 4                  | 3                   | 1                   | 1                     | 291        | 4          | 8       | 15             | 1            | 32            | 0            | 0                | 1             | 362   |
| aHLT11                   | 0                   | 2                  | 5                   | 0                   | 1                     | 265        | 3          | 12      | 15             | 1            | 40            | 0            | 1                | 0             | 345   |
| aHLT13                   | 0                   | 1                  | 2                   | 1                   | 0                     | 263        | 4          | 11      | 14             | 0            | 23            | 0            | 1                | 0             | 320   |
| <b>kHLT</b>              |                     |                    |                     |                     |                       |            |            |         |                |              |               |              |                  |               |       |
| Total # samples detected | 5                   | 20                 | 22                  | 17                  | 3                     | 22         | 22         | 22      | 22             | 11           | 22            | 2            | 16               | 7             | 22    |
| Average Detection        | 0.3                 | 2.0                | 2.9                 | 1.1                 | 0.1                   | 246.9      | 4.5        | 9.9     | 10.4           | 0.6          | 26.0          | 0.1          | 0.7              | 0.3           | 306.0 |
| St. error                | 0.1                 | 0.2                | 0.3                 | 0.2                 | 0.1                   | 10.7       | 0.3        | 0.5     | 0.9            | 0.2          | 2.4           | 0.1          | 0.1              | 0.1           | 13.6  |
| kHLT05                   | 2                   | 3                  | 1                   | 2                   | 0                     | 264        | 6          | 12      | 16             | 0            | 41            | 0            | 0                | 0             | 348   |
| kHLT06                   | 1                   | 3                  | 3                   | 3                   | 0                     | 286        | 7          | 10      | 10             | 0            | 47            | 1            | 1                | 1             | 373   |
| kHLT07                   | 0                   | 4                  | 3                   | 1                   | 1                     | 287        | 5          | 12      | 15             | 2            | 37            | 0            | 1                | 1             | 369   |
| kHLT08                   | 0                   | 1                  | 3                   | 1                   | 0                     | 173        | 5          | 10      | 9              | 0            | 11            | 0            | 1                | 0             | 214   |
| kHLT09                   | 0                   | 0                  | 3                   | 0                   | 0                     | 182        | 2          | 10      | 4              | 0            | 23            | 0            | 0                | 0             | 224   |
| kHLT10                   | 2                   | 1                  | 2                   | 2                   | 0                     | 334        | 3          | 5       | 12             | 1            | 42            | 0            | 1                | 1             | 407   |
| kHLT11                   | 0                   | 1                  | 4                   | 0                   | 1                     | 180        | 3          | 12      | 7              | 0            | 1             | 0            | 0                | 0             | 209   |
| kHLT12                   | 0                   | 2                  | 1                   | 1                   | 0                     | 166        | 2          | 5       | 11             | 1            | 20            | 0            | 0                | 0             | 209   |
| kHLT13                   | 1                   | 2                  | 4                   | 1                   | 0                     | 311        | 6          | 12      | 14             | 1            | 28            | 0            | 1                | 1             | 382   |
| kHLT14                   | 0                   | 2                  | 1                   | 1                   | 0                     | 207        | 4          | 7       | 4              | 0            | 14            | 0            | 1                | 1             | 242   |
| kHLT15                   | 0                   | 2                  | 4                   | 1                   | 0                     | 204        | 3          | 10      | 11             | 1            | 16            | 0            | 1                | 0             | 253   |
| kHLT16                   | 0                   | 3                  | 2                   | 1                   | 0                     | 227        | 3          | 14      | 14             | 1            | 21            | 0            | 1                | 0             | 287   |
| kHLT17                   | 1                   | 4                  | 5                   | 0                   | 0                     | 222        | 6          | 12      | 8              | 0            | 15            | 1            | 1                | 0             | 275   |
| kHLT18                   | 0                   | 1                  | 2                   | 0                   | 0                     | 268        | 3          | 8       | 2              | 0            | 31            | 0            | 1                | 0             | 316   |
| kHLT19                   | 0                   | 0                  | 3                   | 1                   | 0                     | 221        | 4          | 8       | 5              | 0            | 30            | 0            | 0                | 1             | 273   |
| kHLT20                   | 0                   | 2                  | 3                   | 1                   | 0                     | 257        | 5          | 10      | 12             | 1            | 20            | 0            | 1                | 0             | 312   |
| kHLT22                   | 0                   | 1                  | 6                   | 1                   | 0                     | 236        | 6          | 13      | 15             | 1            | 28            | 0            | 1                | 0             | 308   |
| kHLT23                   | 0                   | 3                  | 3                   | 2                   | 0                     | 318        | 7          | 12      | 8              | 3            | 31            | 0            | 1                | 1             | 389   |
| kHLT24                   | 0                   | 2                  | 1                   | 1                   | 0                     | 227        | 3          | 8       | 6              | 0            | 33            | 0            | 0                | 0             | 281   |
| kHLT26                   | 0                   | 2                  | 3                   | 2                   | 1                     | 297        | 7          | 9       | 14             | 0            | 35            | 0            | 1                | 0             | 371   |
| kHLT27                   | 0                   | 2                  | 4                   | 0                   | 0                     | 266        | 4          | 9       | 15             | 1            | 23            | 0            | 1                | 0             | 325   |
| kHLT28                   | 0                   | 3                  | 3                   | 2                   | 0                     | 299        | 5          | 9       | 16             | 1            | 26            | 0            | 1                | 0             | 365   |
